# Supplementary material for: Root-inhabiting fungi in alien plant species in relation to invasion status and soil chemical properties
Source: PubMed Central journal article supplement (PMC4488508; doi:10.1007/s13199-015-0324-4), 2015-05-15
Supplement: 13199_2015_324_MOESM1_ESM.pdf [file 13199_2015_324_MOESM1_ESM.pdf]

## Symbiosis

### Electronic supplementary material

#### Root-inhabiting fungi in alien plant species in relation to invasion status and soil chemical properties

Majewska et al. (2015)

**Table S1** Information on sampling sites, plant species abundance and arbuscular mycorrhizal fungi extracted from particular trap cultures established from the soils collected from under the alien plant species.

| Plant family          | Plant species                       | Sample/trap culture number | Locality         | Coordinates              | Type of habitat <sup>a</sup> | Habitat         | Plant species abundance in the stand <sup>b</sup> | Fungal species                                                                                                  |
|-----------------------|-------------------------------------|----------------------------|------------------|--------------------------|------------------------------|-----------------|---------------------------------------------------|-----------------------------------------------------------------------------------------------------------------|
| <i>Aceraceae</i>      | <i>Acer negundo</i> L.              | 35                         | Burletka         | 49°50'34"N<br>20°02'58"E | ANT                          | roadside        | 1                                                 | <i>Claroideoglossum claroideum</i> (N.C. Schenck & G.S.Sm.) C. Walker & A. Schüßler                             |
|                       |                                     | 41                         | Podolsze         | 50°01'54"N<br>19°26'18"E | S-NAT                        | mesic meadow    | 1                                                 | <i>Claroideoglossum claroideum</i>                                                                              |
|                       |                                     | 46                         | Jankowice        | 50°01'55"N<br>19°26'19"E | S-NAT                        | shrub           | 1                                                 | <i>Septoglossum constrictum</i> (Trappe) Sieverd., G.A. Silva & Oehl<br>Unidentified spores present             |
| <i>Anacardiaceae</i>  | <i>Rhus typhina</i> L.              | 36                         | Burletka         | 49°50'34"N<br>20°02'58"E | ANT                          | roadside        | 1                                                 | <i>Claroideoglossum claroideum</i>                                                                              |
|                       |                                     | 83                         | Kraków-Kliny     | 49°59'48"N<br>19°52'09"E | ANT                          | roadside        | 1                                                 | <i>Glomus aggregatum</i> N.C. Schenck & G.S. Sm.<br><i>Glomus</i> sp.                                           |
| <i>Apiaceae</i>       | <i>Chaerophyllum aureum</i> L.      | 11                         | Surochów         | 50°00'43"N<br>22°46'03"E | ANT                          | shrub           | 2                                                 | <i>Claroideoglossum claroideum</i>                                                                              |
|                       |                                     | 54                         | Lipienice        | 51°14'32"N<br>20°58'01"E | ANT                          | mesic meadow    | 3                                                 | <i>Funneliformis mosseae</i> (T.H. Nicolson & Gerd.) C. Walker & A. Schüßler<br><i>Septoglossum constrictum</i> |
|                       | <i>Heracleum sosnowskyi</i> Manden. | 45                         | Radzionków       | 50°22'55"N<br>18°55'25"E | ANT                          | fallow          | 3                                                 | <i>Claroideoglossum claroideum</i>                                                                              |
| <i>Asclepiadaceae</i> | <i>Asclepias syriaca</i> L.         | 53                         | Lipienice        | 51°14'32"N<br>20°58'01"E | ANT                          | mesic meadow    | 3                                                 | <i>Claroideoglossum claroideum</i><br><i>Septoglossum constrictum</i>                                           |
| <i>Asteraceae</i>     | <i>Ambrosia artemisiifolia</i> L.   | 12                         | Jarosław         | 50°01'13"N<br>22°42'14"E | ANT                          | fallow          | 1                                                 | Unidentified spores present                                                                                     |
|                       |                                     | 81                         | Zator            | 49°59'56"N<br>19°26'48"E | S-NAT                        | fallow          | 2                                                 | Morphotype with glomoid spores similar to those of <i>Diversispora</i><br><i>Septoglossum constrictum</i>       |
|                       | <i>Aster lanceolatus</i> Willd.     | 82                         | Zator            | 49°59'59"N<br>19°26'40"E | S-NAT                        | fallow          | 2                                                 | <i>Claroideoglossum claroideum</i>                                                                              |
|                       | <i>Aster novi-belgii</i> L.         | 39                         | Dąbrowa Górnicza | 50°18'53"N<br>19°11'35"E | S-NAT                        | wet meadow      | 3                                                 | <i>Diversispora epigaea</i> (B.A. Daniels & Trappe) C. Walker & A. Schüßler<br><i>Septoglossum constrictum</i>  |
|                       |                                     | 68                         | Szczucin         | 50°18'48"N<br>21°03'14"E | S-NAT                        | wet meadow      | 2                                                 | <i>Claroideoglossum claroideum</i><br><i>Funneliformis mosseae</i>                                              |
|                       | <i>Bidens frondosa</i> L.           | 8                          | Ulanów           | 50°29'13"N               | NAT                          | alluvial forest | 2                                                 | Morphotype with glomoid spores similar to those of <i>Diversispora</i>                                          |

|                                                 |    |                 |                                        |       |                    |   |                                                                                                                                                                                          |
|-------------------------------------------------|----|-----------------|----------------------------------------|-------|--------------------|---|------------------------------------------------------------------------------------------------------------------------------------------------------------------------------------------|
|                                                 | 32 | Stadniki        | 22°15'43"E<br>49°53'17"N<br>20°09'54"E | ANT   | roadside           | 2 | <i>Claroideoglossus claroideum</i>                                                                                                                                                       |
|                                                 | 37 | Burletka        | 49°50'34"N<br>20°02'58"E               | ANT   | roadside           | 2 | <i>Claroideoglossus claroideum</i><br><i>Claroideoglossus drummondii</i> (Blasz. & C. Renker) C. Walker & A. Schüßler<br><i>Septoglossus constrictum</i><br>Unidentified spores present  |
| <i>Conyza canadensis</i> (L.) Cronquist         | 34 | Burletka        | 49°50'34"N<br>20°02'58"E               | ANT   | shrub              | 2 | <i>Claroideoglossus claroideum</i><br>Morphotype with glomoid spores similar to those of <i>Diversispora</i><br><i>Claroideoglossus claroideum</i>                                       |
|                                                 | 47 | Pakosław        | 51°10'36"E<br>49°59'27"N<br>20°17'20"E | ANT   | sand grassland     | 1 | <i>Claroideoglossus claroideum</i><br><i>Septoglossus constrictum</i><br><i>Funneliformis caledonium</i> (T.H. Nicolson & Gerd.) C. Walker & A. Schüßler                                 |
|                                                 | 64 | Kłaj            | 50°00'32"N<br>20°15'22"E               | ANT   | fallow             | 3 | <i>Claroideoglossus claroideum</i><br><i>Septoglossus constrictum</i><br><i>Claroideoglossus claroideum</i>                                                                              |
| <i>Echinops sphaerocephalus</i> L.              | 58 | Szarów          | 50°41'22"N<br>21°58'45"E               | ANT   | fallow             | 1 | <i>Claroideoglossus claroideum</i><br><i>Septoglossus constrictum</i><br><i>Funneliformis caledonium</i> (T.H. Nicolson & Gerd.) C. Walker & A. Schüßler                                 |
| <i>Erechtites hieracifolia</i> (L.) Raf. ex DC. | 3  | Radomyśl        | 49°50'34"N<br>20°02'58"E               | S-NAT | pine forest        | 2 | <i>Claroideoglossus claroideum</i><br><i>Septoglossus constrictum</i><br><i>Claroideoglossus claroideum</i>                                                                              |
| <i>Erigeron annuus</i> (L.) Pers.               | 38 | Burletka        | 50°00'32"N<br>20°15'22"E               | ANT   | roadside           | 1 | <i>Claroideoglossus claroideum</i><br><i>Septoglossus constrictum</i><br><i>Claroideoglossus claroideum</i>                                                                              |
|                                                 | 40 | Szarów          | 49°59'27"N<br>20°17'20"E               | ANT   | fallow             | 2 | <i>Claroideoglossus claroideum</i><br><i>Septoglossus constrictum</i><br><i>Claroideoglossus claroideum</i>                                                                              |
|                                                 | 57 | Kłaj            | 50°23'06"N<br>18°55'41"E               | ANT   | fallow             | 2 | <i>Claroideoglossus claroideum</i><br><i>Septoglossus constrictum</i><br><i>Claroideoglossus claroideum</i>                                                                              |
| <i>Galinsoga ciliata</i> (Raf.) S.F. Blake      | 44 | Piekary Śląskie | 49°59'27"N<br>20°17'20"E               | ANT   | roadside           | 2 | <i>Claroideoglossus claroideum</i><br><i>Septoglossus constrictum</i><br><i>Claroideoglossus claroideum</i>                                                                              |
|                                                 | 59 | Kłaj            | 50°00'32"N<br>20°15'22"E               | ANT   | fallow             | 2 | <i>Claroideoglossus claroideum</i><br><i>Septoglossus constrictum</i><br><i>Claroideoglossus claroideum</i>                                                                              |
|                                                 | 62 | Szarów          | 50°00'32"N<br>20°15'22"E               | ANT   | fallow             | 1 | <i>Claroideoglossus claroideum</i><br><i>Septoglossus constrictum</i><br><i>Claroideoglossus claroideum</i>                                                                              |
| <i>Galinsoga parviflora</i> Cav.                | 63 | Szarów          | 49°59'13"N<br>20°22'17"E               | ANT   | fallow             | 1 | <i>Claroideoglossus claroideum</i><br><i>Septoglossus constrictum</i><br><i>Claroideoglossus claroideum</i>                                                                              |
|                                                 | 69 | Stanisławice    | 49°50'36"N<br>19°55'51"E               | ANT   | arable field       | 1 | <i>Claroideoglossus claroideum</i><br><i>Septoglossus constrictum</i><br><i>Funneliformis mosseae</i><br><i>Septoglossus constrictum</i><br><i>Paraglossus majewskii</i> Blasz. & Kovács |
| <i>Helianthus ×laetiflorus</i> Pers.            | 19 | Myślenice       | 50°03'57"N<br>20°00'18"E               | ANT   | roadside           | 1 | <i>Claroideoglossus claroideum</i><br><i>Septoglossus constrictum</i><br><i>Claroideoglossus claroideum</i>                                                                              |
|                                                 | 30 | Kraków          | 50°17'26"N<br>22°26'29"E               | ANT   | roadside           | 2 | <i>Claroideoglossus claroideum</i><br><i>Septoglossus constrictum</i><br><i>Claroideoglossus claroideum</i>                                                                              |
| <i>Helianthus tuberosus</i> L.                  | 15 | Kuryłówka       | 49°51'45"N<br>19°55'06"E               | NAT   | alluvial forest    | 2 | Unidentified spores present<br><i>Septoglossus constrictum</i><br><i>Claroideoglossus claroideum</i>                                                                                     |
|                                                 | 24 | Stróża          | 49°59'59"N<br>19°51'52"E               | ANT   | river bank         | 2 | <i>Claroideoglossus claroideum</i><br><i>Septoglossus constrictum</i><br><i>Claroideoglossus claroideum</i>                                                                              |
|                                                 | 33 | Kraków          | 51°12'39"N<br>21°10'36"E               | S-NAT | fallow             | 2 | <i>Claroideoglossus claroideum</i><br><i>Septoglossus constrictum</i><br><i>Claroideoglossus claroideum</i>                                                                              |
|                                                 | 50 | Pakosław        | 49°59'35"N<br>20°20'32"E               | NAT   | shrub              | 2 | <i>Claroideoglossus claroideum</i><br><i>Septoglossus constrictum</i><br><i>Claroideoglossus claroideum</i>                                                                              |
|                                                 | 55 | Stanisławice    | 49°51'44"N<br>19°55'06"E               | ANT   | fallow             | 1 | <i>Claroideoglossus claroideum</i><br><i>Septoglossus constrictum</i><br><i>Claroideoglossus claroideum</i>                                                                              |
| <i>Rudbeckia laciniata</i> L.                   | 10 | Łazy            | 49°51'44"N<br>19°55'06"E               | S-NAT | mesic meadow       | 3 | Unidentified spores present<br><i>Claroideoglossus claroideum</i><br><i>Septoglossus constrictum</i><br><i>Claroideoglossus claroideum</i>                                               |
|                                                 | 16 | Krzyszkowice    | 50°01'05"N<br>19°26'23"E               | S-NAT | herbaceous fringes | 3 | Unidentified spores present<br><i>Claroideoglossus claroideum</i><br><i>Septoglossus constrictum</i><br><i>Claroideoglossus claroideum</i>                                               |
|                                                 | 18 | Podolsze        | 49°50'34"N                             | ANT   | fallow             | 3 | <i>Rhizophagus irregularis</i> (Blasz., Wubet, Renker & Buscot) C. Walker & A. Schüßler                                                                                                  |
|                                                 | 23 | Brzezowa        |                                        | ANT   | fallow             | 3 | Unidentified spores present                                                                                                                                                              |

|               |                                                        |    |              |                                        |       |                    |   |                                                                                                                                                                                                                                                                                                                |
|---------------|--------------------------------------------------------|----|--------------|----------------------------------------|-------|--------------------|---|----------------------------------------------------------------------------------------------------------------------------------------------------------------------------------------------------------------------------------------------------------------------------------------------------------------|
|               |                                                        | 25 | Krzyszkwice  | 20°02'52"E<br>49°51'46"N<br>19°55'41"E | S-NAT | meadow             | 3 | Unidentified spores present                                                                                                                                                                                                                                                                                    |
|               | <i>Solidago canadensis</i> L.                          | 21 | Kraków       | 50°02'50"N<br>20°12'22"E               | S-NAT | meadow             | 3 | <i>Rhizophagus irregularis</i>                                                                                                                                                                                                                                                                                 |
|               |                                                        | 22 | Polanka      | 49°51'45"N<br>19°55'06"E               | S-NAT | meadow             | 2 | Unidentified spores present                                                                                                                                                                                                                                                                                    |
|               |                                                        | 56 | Stanisławice | 49°59'35"N<br>20°20'32"E               | ANT   | fallow             | 2 | <i>Claroideoglossum claroideum</i><br>Morphotype with glomoid spores similar to those of <i>Diversispora</i><br><i>Funneliformis mosseae</i><br><i>Septoglossum constrictum</i><br><i>Scutellospora dipurpurescens</i> J. B. Morton & Koske<br><i>Septoglossum constrictum</i><br><i>Funneliformis mosseae</i> |
|               | <i>Solidago gigantea</i> Aiton                         | 1  | Radomyśl     | 50°41'19"N<br>21°58'12"E               | NAT   | pine forest        | 2 | <i>Septoglossum constrictum</i><br><i>Scutellospora dipurpurescens</i> J. B. Morton & Koske<br><i>Septoglossum constrictum</i><br><i>Funneliformis mosseae</i>                                                                                                                                                 |
|               |                                                        | 2  | Przykopa     | 50°08'42"N<br>22°35'43"E               | S-NAT | mesic meadow       | 3 | <i>Funneliformis mosseae</i><br><i>Paraglossum majewskii</i><br>Unidentified spores present                                                                                                                                                                                                                    |
|               |                                                        | 9  | Leżajsk      | 50°15'51"N<br>22°23'14"E               | ANT   | roadside           | 3 | <i>Septoglossum constrictum</i>                                                                                                                                                                                                                                                                                |
|               |                                                        | 17 | Kraków       | 50°02'50"N<br>20°12'22"E               | S-NAT | meadow             | 3 | <i>Funneliformis mosseae</i><br><i>Paraglossum majewskii</i><br>Unidentified spores present                                                                                                                                                                                                                    |
|               |                                                        | 20 | Odwiśle      | 49°58'52"N<br>19°45'23"E               | S-NAT | meadow             | 3 | <i>Funneliformis mosseae</i><br><i>Paraglossum majewskii</i><br>Unidentified spores present                                                                                                                                                                                                                    |
|               | <i>Xanthium albinum</i> Royle<br>(Widder) H. Scholtz   | 70 | Szczucin     | 50°19'36"N<br>21°04'29"E               | NAT   | river bank         | 2 | <i>Claroideoglossum claroideum</i><br><i>Funneliformis mosseae</i><br><i>Glomus microaggregatum</i> Koske, Gemma & P.D. Olexia<br><i>Septoglossum constrictum</i><br><i>Claroideoglossum claroideum</i>                                                                                                        |
|               |                                                        | 71 | Nowy Korczyn | 50°17'23"N<br>20°48'05"E               | NAT   | river bank         | 1 | <i>Claroideoglossum claroideum</i>                                                                                                                                                                                                                                                                             |
|               |                                                        | 72 | Koszyce      | 50°09'08"N<br>20°36'31"E               | NAT   | river bank         | 2 | <i>Claroideoglossum claroideum</i>                                                                                                                                                                                                                                                                             |
| Balsaminaceae | <i>Impatiens glandulifera</i> Royle                    | 6  | Przykopa     | 50°08'42"N<br>22°35'44"E               | S-NAT | herbaceous fringes | 2 | Unidentified spores present                                                                                                                                                                                                                                                                                    |
|               |                                                        | 7  | Ulanów       | 50°29'13"N<br>22°15'43"E               | NAT   | alluvial forest    | 2 | <i>Septoglossum constrictum</i>                                                                                                                                                                                                                                                                                |
|               |                                                        | 13 | Jarosław     | 50°01'13"N<br>22°42'14"E               | S-NAT | herbaceous fringes | 3 | Unidentified spores present                                                                                                                                                                                                                                                                                    |
|               |                                                        | 26 | Stróża       | 49°47'21"N<br>19°55'59"E               | S-NAT | herbaceous fringes | 2 | <i>Scutellospora dipurpurescens</i>                                                                                                                                                                                                                                                                            |
|               |                                                        | 27 | Zakopane     | 49°17'09"N<br>19°58'58"E               | ANT   | garden             | 2 | <i>Glomus macrocarpum</i> Tul. & C. Tul.                                                                                                                                                                                                                                                                       |
|               | <i>Impatiens parviflora</i> DC.                        | 5  | Przykopa     | 50°08'42"N<br>22°35'44"E               | NAT   | alluvial forest    | 2 | Unidentified spores present                                                                                                                                                                                                                                                                                    |
|               |                                                        | 14 | Krzyszów     | 50°24'08"N<br>22°20'05"E               | ANT   | herbaceous fringes | 3 | <i>Claroideoglossum claroideum</i>                                                                                                                                                                                                                                                                             |
|               |                                                        | 48 | Pakosław     | 51°12'39"N<br>21°10'36"E               | ANT   | fallow             | 3 | <i>Claroideoglossum claroideum</i><br><i>Glomus aggregatum</i><br>Unidentified spores present                                                                                                                                                                                                                  |
| Cucurbitaceae | <i>Echinocystis lobata</i> (F. Michx.) Torr. & A. Gray | 4  | Przykopa     | 50°08'42"N<br>22°35'44"E               | NAT   | alluvial forest    | 2 | Unidentified spores present                                                                                                                                                                                                                                                                                    |
|               |                                                        | 31 | Stadniki     | 49°53'17"N<br>20°09'54"E               | ANT   | roadside           | 2 | Unidentified spores present                                                                                                                                                                                                                                                                                    |
|               |                                                        | 49 | Pakosław     | 51°12'39"N<br>21°10'36"E               | ANT   | shrub              | 2 | <i>Claroideoglossum claroideum</i><br><i>Septoglossum constrictum</i><br><i>Claroideoglossum claroideum</i>                                                                                                                                                                                                    |
|               | <i>Thladiantha dubia</i> Bunge                         | 51 | Pakosław     | 51°12'39"N<br>21°10'36"E               | ANT   | shrub              | 2 | <i>Claroideoglossum claroideum</i><br><i>Septoglossum constrictum</i><br><i>Claroideoglossum claroideum</i>                                                                                                                                                                                                    |
| Fabaceae      | <i>Lupinus polyphyllus</i> Lindl.                      | 79 | Klucze       | 50°19'59"N<br>19°31'16"E               | S-NAT | pine forest        | 1 | Unidentified spores present                                                                                                                                                                                                                                                                                    |
|               |                                                        | 80 | Bogucin Mały | 50°18'59"N                             | ANT   | roadside           | 1 | <i>Septoglossum constrictum</i>                                                                                                                                                                                                                                                                                |

|                     |                                                                          |    |                         |                          |       |                       |   |                                                                                                                                                                                                        |
|---------------------|--------------------------------------------------------------------------|----|-------------------------|--------------------------|-------|-----------------------|---|--------------------------------------------------------------------------------------------------------------------------------------------------------------------------------------------------------|
|                     | <i>Robinia pseudoacacia</i> L.                                           | 29 | Płoki                   | 19°35'13"E<br>50°12'46"N | S-NAT | pine forest           | 2 | <i>Claroideoglossum claroideum</i>                                                                                                                                                                     |
|                     |                                                                          | 65 | Szarów                  | 19°30'39"E<br>50°00'32"N | ANT   | fallow                | 1 | <i>Septoglossum constrictum</i><br><i>Claroideoglossum claroideum</i>                                                                                                                                  |
|                     |                                                                          | 66 | Szarów                  | 20°15'22"E<br>50°00'32"N | S-NAT | forest edge           | 1 | <i>Funneliformis mosseae</i><br><i>Septoglossum constrictum</i>                                                                                                                                        |
| <i>Juglandaceae</i> | <i>Juglans regia</i> L.                                                  | 43 | Kraków                  | 20°15'22"E<br>50°02'13"N | S-NAT | fallow                | 1 | <i>Claroideoglossum claroideum</i><br><i>Funneliformis mosseae</i><br><i>Septoglossum constrictum</i>                                                                                                  |
|                     |                                                                          | 61 | Szarów                  | 19°54'55"E<br>50°00'32"N | ANT   | fallow                | 1 | Unidentified spores present                                                                                                                                                                            |
|                     |                                                                          | 77 | Stanisławice            | 20°15'22"E<br>49°59'13"N | ANT   | fallow                | 1 | <i>Funneliformis mosseae</i>                                                                                                                                                                           |
| <i>Oleaceae</i>     | <i>Fraxinus pennsylvanica</i><br>Marshall                                | 52 | Lipienice /<br>Jastrząb | 20°22'17"E<br>51°14'55"N | S-NAT | shrub                 | 1 | <i>Septoglossum constrictum</i>                                                                                                                                                                        |
| <i>Oxalidaceae</i>  | <i>Oxalis fontana</i> Bunge (= <i>O.</i><br><i>stricta</i> L.)           | 75 | Stanisławice            | 20°59'09"E<br>49°59'13"N | ANT   | arable field          | 2 | <i>Funneliformis mosseae</i><br><i>Septoglossum constrictum</i>                                                                                                                                        |
| <i>Poaceae</i>      | <i>Eragrostis albensis</i> H. Scholz                                     | 84 | Jarosław                | 20°22'17"E<br>50°03'11"N | ANT   | roadside              | 1 | <i>Septoglossum constrictum</i>                                                                                                                                                                        |
|                     |                                                                          | 85 | Sieniawa                | 22°41'45"E<br>50°09'58"N | ANT   | roadside              | 2 | <i>Septoglossum constrictum</i>                                                                                                                                                                        |
|                     |                                                                          | 86 | Nowa Sarzyna            | 22°35'12"E<br>50°19'17"N | ANT   | roadside              | 1 | Unidentified spores present                                                                                                                                                                            |
| <i>Polygonaceae</i> | <i>Reynoutria japonica</i> Houtt.                                        | 87 | Zator                   | 22°20'58"E<br>49°59'59"N | NAT   | herbaceous<br>fringes | 3 | Unidentified spores present                                                                                                                                                                            |
|                     |                                                                          | 88 | Smolice                 | 19°26'40"E<br>50°01'46"N | NAT   | herbaceous<br>fringes | 2 | <i>Septoglossum constrictum</i><br><i>Funneliformis</i> sp.                                                                                                                                            |
|                     |                                                                          | 89 | Jaroszowice             | 19°26'34"E<br>49°51'27"N | NAT   | herbaceous<br>fringes | 3 | <i>Septoglossum constrictum</i>                                                                                                                                                                        |
|                     |                                                                          | 90 | Imielin                 | 19°30'55"E<br>50°07'32"N | ANT   | fallow                | 3 | <i>Septoglossum constrictum</i>                                                                                                                                                                        |
|                     |                                                                          | 91 | Dulowa                  | 19°11'51"E<br>50°08'32"N | ANT   | fallow                | 3 | <i>Septoglossum constrictum</i>                                                                                                                                                                        |
| <i>Rosaceae</i>     | <i>Padus serotina</i> (Ehrh.) Borkh.<br>(= <i>Prunus serotina</i> Ehrh.) | 28 | Płoki                   | 19°32'11"E<br>50°12'46"N | S-NAT | pine forest           | 2 | Unidentified spores present                                                                                                                                                                            |
|                     |                                                                          | 74 | Olkusz                  | 19°30'39"E<br>50°14'19"N | ANT   | roadside              | 2 | <i>Septoglossum constrictum</i>                                                                                                                                                                        |
|                     |                                                                          | 78 | Jaroszowiec             | 19°32'20"E<br>50°19'00"N | S-NAT | pine forest           | 2 | Unidentified spores present                                                                                                                                                                            |
|                     |                                                                          | 60 | Szarów                  | 19°35'50"E<br>50°00'32"N | ANT   | fallow                | 2 | <i>Claroideoglossum claroideum</i>                                                                                                                                                                     |
| <i>Solanaceae</i>   | <i>Spiraea x pseudosalicifolia</i><br>Silverside                         |    |                         | 20°15'22"E<br>50°09'08"N | S-NAT | river bank            | 1 | <i>Claroideoglossum claroideum</i>                                                                                                                                                                     |
| <i>Solanaceae</i>   | <i>Lycopersicon esculentum</i> Mill.                                     | 73 | Koszyce                 | 20°36'31"E<br>50°18'53"N | S-NAT | wet meadow            | 2 | <i>Claroideoglossum claroideum</i><br><i>Diversispora eburnea</i> (L.J. Kenn., J.C. Stutz & J.B. Morton) C.<br>Walker & A. Schüßler<br><i>Funneliformis mosseae</i><br><i>Septoglossum constrictum</i> |
| <i>Typhaceae</i>    | <i>Typha laxmannii</i> Lepech.                                           | 42 | Dąbrowa<br>Górnicza     | 19°11'35"E<br>50°00'32"N | ANT   | fallow                | 2 | <i>Claroideoglossum claroideum</i><br><i>Funneliformis mosseae</i>                                                                                                                                     |
| <i>Vitaceae</i>     | <i>Parthenocissus inserta</i> (A.<br>Kern.) Fritsch                      | 67 | Szarów                  | 20°15'22"E               | ANT   | fallow                | 2 | <i>Claroideoglossum claroideum</i><br><i>Funneliformis mosseae</i>                                                                                                                                     |

<sup>a</sup> Type of habitat: NAT – natural, S-NAT – semi-natural, ANT – anthropogenic.

<sup>b</sup> Plant species abundance in the stand: 1 – small population (1-9 plants per locality), 2 – medium-size population (10-100 plants per locality, occurring in small groups or scattered), 3 – large population (>100 plants per locality, forming numerous and dense patches).
