# Supplementary material for: Root-inhabiting fungi in alien plant species in relation to invasion status and soil chemical properties
Source: PubMed Central journal article supplement (PMC4488508; doi:10.1007/s13199-015-0324-4), 2015-05-15
Supplement: 13199_2015_324_MOESM2_ESM.pdf [file 13199_2015_324_MOESM2_ESM.pdf]

## Symbiosis

### Electronic supplementary material

#### Root-inhabiting fungi in alien plant species in relation to invasion status and soil chemical properties

Majewska et al. (2015)

**Table S2** The chemical properties of the soils collected from under the alien plant species.

| Family                  | Plant species                   | pH          | N %         | C %         | Organic matter % | C/N          | Available content<br>mg 100 g <sup>-1</sup> of dry soil |                               |                | Exchangeable cations<br>mg 100 g <sup>-1</sup> of dry soil |                      |                  |  |
|-------------------------|---------------------------------|-------------|-------------|-------------|------------------|--------------|---------------------------------------------------------|-------------------------------|----------------|------------------------------------------------------------|----------------------|------------------|--|
|                         |                                 |             |             |             |                  |              | K <sub>2</sub> O                                        | P <sub>2</sub> O <sub>5</sub> | K <sup>+</sup> | Na <sup>+</sup>                                            | Ca <sup>2+</sup>     | Mg <sup>2+</sup> |  |
| <i>Aceraceae</i>        | <i>Acer negundo</i>             | 6.82 ± 0.43 | 0.24 ± 0.07 | 3.34 ± 1.08 | 5.76 ± 1.86      | 14.17 ± 3.36 | 23.1 ± 13.1                                             | 27.2 ± 11.1                   | 15.9 ± 11.8    | 4.0 ± 1.0                                                  | 209.3 ± 50.9         | 25.3 ± 4.0       |  |
| <i>Anacardiaceae</i>    | <i>Rhus typhina</i>             | 6.94 ± 0.74 | 0.17 ± 0.02 | 2.36 ± 0.07 | 4.08 ± 0.12      | 14.30 ± 1.84 | 15.0 ± 4.2                                              | >40                           | 7.8 ± 3.4      | 5.0 ± 0.6                                                  | 179.0 ± 157.0        | 20.4 ± 18.1      |  |
| <i>Apiaceae</i>         | <i>Chaerophyllum aureum</i>     | 7.14 ± 0.29 | 0.25 ± 0.04 | 3.70 ± 1.79 | 6.39 ± 3.08      | 14.25 ± 4.60 | 22.8 ± 3.7                                              | 20.9 ± 7.1                    | 14.9 ± 3.5     | 6.2 ± 4.6                                                  | 354.5 ± 340.1        | 7.5 ± 2.1        |  |
|                         | <i>Heracleum sosnowskyi</i>     | 7.33        | 0.23        | 3.92        | 6.76             | 17.30        | 41.6                                                    | >40                           | 32.2           | 5.0                                                        | 248.0                | 23.2             |  |
| <i>Asclepiadaceae</i>   | <i>Asclepias syriaca</i>        | 6.96        | 0.17        | 2.62        | 4.51             | 15.60        | 7.2                                                     | 9.8                           | 3.6            | 1.0                                                        | 90.0                 | 1.6              |  |
| <i>Asteraceae</i>       | <i>Ambrosia artemisiifolia</i>  | 7.76        | 0.15        | 2.10        | 3.63             | 14.10        | 19.8                                                    | 15.0                          | 10.0           | 12.5                                                       | 825.0                | 3.0              |  |
|                         | <i>Aster lanceolatus</i>        | 7.37 ± 0.06 | 0.14 ± 0.04 | 2.04 ± 0.27 | 3.52 ± 0.47      | 14.35 ± 1.91 | 14.5 ± 1.5                                              | >40                           | 7.9 ± 0.4      | 42.1 ± 47.9                                                | 305.0 ± 15.5         | 26.8 ± 1.7       |  |
|                         | <i>Aster novi-belgii</i>        | 7.25 ± 0.20 | 0.26 ± 0.17 | 4.10 ± 2.92 | 7.07 ± 5.04      | 15.10 ± 1.41 | 17.0 ± 1.4                                              | 12.8 ± 5.7                    | 11.6 ± 1.97    | 10.8 ± 0.3                                                 | 290.0 ± 113.1        | 26.0 ± 0.6       |  |
|                         | <i>Bidens frondosa</i>          | 6.96 ± 0.57 | 0.20 ± 0.15 | 2.98 ± 2.22 | 5.13 ± 3.83      | 14.93 ± 1.36 | 21.1 ± 14.6                                             | 28.9 ± 19.2                   | 12.5 ± 10.1    | 6.4 ± 4.0                                                  | 331 ± 176.8          | 19.7 ± 15.3      |  |
|                         | <i>Conyza canadensis</i>        | 7.32 ± 0.44 | 0.11        | 1.59 ± 1.60 | 2.75 ± 2.76      | 13.93 ± 0.65 | 17.0 ± 3.2                                              | 30.7 ± 16.2                   | 11.5 ± 1.5     | 4.0 ± 4.2                                                  | 187.3 ± 164.2        | 8.5 ± 9.3        |  |
|                         | <i>Echinops sphaerocephalus</i> | 7.12        | 0.15        | 2.39        | 4.12             | 16.20        | 14.8                                                    | 12.2                          | 11.6           | 4.6                                                        | 154.0                | 15.0             |  |
|                         | <i>Erechtites hieracifolia</i>  | 5.18        | 0.24        | 4.58        | 7.90             | 18.80        | 3.6                                                     | 1.8                           | 3.0            | 5.0                                                        | 35.0                 | 2.0              |  |
|                         | <i>Erigeron annuus</i>          | 7.28 ± 0.34 | 0.14 ± 0.04 | 2.06 ± 0.67 | 3.55 ± 1.15      | 14.8 ± 0.40  | 11.6 ± 2.8                                              | 22.5 ± 15.6                   | 7.4 ± 2.4      | 5.1 ± 1.8                                                  | 270.0 ± 82.4         | 26.4 ± 3.6       |  |
|                         | <i>Galinsoga ciliata</i>        | 6.97 ± 0.95 | 0.23 ± 0.06 | 3.34 ± 1.49 | 5.76 ± 2.57      | 13.73 ± 2.70 | 29.9 ± 12.5                                             | 19.6 ± 10.1                   | 26.1 ± 15.0    | 7.1 ± 1.9                                                  | 293.3 ± 179.6        | 23.4 ± 6.4       |  |
|                         | <i>Galinsoga parviflora</i>     | 6.79 ± 1.23 | 0.14 ± 0.03 | 1.83 ± 0.19 | 3.16 ± 0.32      | 12.70 ± 1.27 | 30.0 ± 7.3                                              | 21.1 ± 11.2                   | 24.0 ± 1.4     | 5.3 ± 2.4                                                  | 209.0 ± 140.0        | 19.5 ± 0.1       |  |
|                         | <i>Helianthus ×laetiflorus</i>  | 7.11 ± 0.04 | 0.28 ± 0.19 | 3.68 ± 2.31 | 6.34 ± 3.99      | 13.65 ± 1.20 | 14.5 ± 3.5                                              | 24.6 ± 14.7                   | 8.2 ± 1.1      | 9.9 ± 2.7                                                  | 457.0 ± 264.4        | 24.2 ± 22.3      |  |
|                         | <i>Helianthus tuberosus</i>     | 7.53 ± 0.24 | 0.15 ± 0.10 | 2.17 ± 1.47 | 3.74 ± 2.54      | 15.24 ± 2.41 | 13.8 ± 4.7                                              | 22.5 ± 13.9                   | 7.8 ± 2.8      | 7.5 ± 4.9                                                  | 332.6 ± 179.1        | 8.2 ± 5.9        |  |
|                         | <i>Rudbeckia laciniata</i>      | 6.25 ± 0.85 | 0.24 ± 0.14 | 3.48 ± 2.52 | 6.00 ± 4.34      | 14.36 ± 2.80 | 15.9 ± 6.4                                              | 10.9 ± 5.7                    | 12.0 ± 5.9     | 10.1 ± 3.9                                                 | 285.0 ± 141.5        | 6.7 ± 3.1        |  |
|                         | <i>Solidago canadensis</i>      | 7.02 ± 0.77 | 0.20 ± 0.10 | 2.94 ± 1.34 | 5.07 ± 2.32      | 14.60 ± 1.65 | 24.3 ± 4.0                                              | 25.4 ± 7.5                    | 16.1 ± 2.9     | 9.1 ± 2.4                                                  | 296.7 ± 62.5         | 13.4 ± 8.2       |  |
|                         | <i>Solidago gigantea</i>        | 6.63 ± 0.90 | 0.14 ± 0.05 | 2.17 ± 0.95 | 3.74 ± 1.64      | 15.24 ± 2.95 | 13.8 ± 10.6                                             | 10.2 ± 8.4                    | 10.3 ± 7.5     | 9.2 ± 5.8                                                  | 310.0 ± 334.9        | 3.7 ± 2.9        |  |
| <i>Xanthium albinum</i> | 7.51 ± 0.11                     | 0.08 ± 0.02 | 1.24 ± 0.33 | 2.13 ± 0.57 | 15.03 ± 1.26     | 10.5 ± 4.5   | 30.8 ± 12.9                                             | 7.5 ± 2.2                     | 10.9 ± 1.3     | 296.0 ± 65.4                                               | 17.5 ± 4.0           |                  |  |
| <i>Balsaminaceae</i>    | <i>Impatiens glandulifera</i>   | 7.53 ± 0.42 | 0.25 ± 0.31 | 3.28 ± 4.01 | 5.68 ± 6.89      | 14.38 ± 1.78 | 27.9 ± 32.7                                             | 15.2 ± 14.7                   | 20.2 ± 24.8    | <b>12.4 ± 2.7</b>                                          | <b>617.0 ± 186.8</b> | 15.2 ± 22.9      |  |

|                      |                                   |             |             |             |             |              |             |             |             |                  |                  |              |
|----------------------|-----------------------------------|-------------|-------------|-------------|-------------|--------------|-------------|-------------|-------------|------------------|------------------|--------------|
| <i>Cucurbitaceae</i> | <i>Impatiens parviflora</i>       | 7.54 ± 0.20 | 0.15 ± 0.84 | 2.25 ± 1.59 | 3.89 ± 2.75 | 13.87 ± 2.60 | 19.6 ± 9.0  | 14.3 ± 3.7  | 14.2 ± 12.7 | 7.0 ± 4.0        | 366.3 ± 143.2    | 3.3 ± 2.0    |
|                      | <i>Echinocystis lobata</i>        | 7.06 ± 1.24 | 0.39 ± 0.33 | 4.80 ± 4.48 | 8.28 ± 7.71 | 11.77 ± 0.90 | 54.9 ± 47.6 | 31.6 ± 14.5 | 44.5 ± 39.9 | 7.3 ± 3.8        | 458.7 ± 328.7    | 23.5 ± 28.1  |
|                      | <i>Thladiantha dubia</i>          | 7.84        | 0.26        | 3.72        | 6.41        | 14.20        | 37.4        | >40         | 20.6        | 5.8              | 340.0            | 30.8         |
| <i>Fabaceae</i>      | <i>Lupinus polyphyllus</i>        | 6.36 ± 0.23 | 0.26 ± 0.01 | 3.44 ± 0.20 | 5.94 ± 0.32 | 13.35 ± 1.06 | 7.0 ± 4.2   | 14.9 ± 3.8  | 3.0         | 3.0              | 65.0 ± 35.3      | 5.6 ± 1.6    |
|                      | <i>Robinia pseudoacacia</i>       | 7.02 ± 0.10 | 0.24 ± 0.01 | 3.10 ± 0.40 | 5.34 ± 0.69 | 12.63 ± 0.75 | 15.8 ± 10.8 | 14.8 ± 9.7  | 13.1 ± 10.9 | 4.5 ± 2.7        | 169.3 ± 150.1    | 17.3 ± 5.5   |
| <i>Juglandaceae</i>  | <i>Juglans regia</i>              | 6.68 ± 0.40 | 0.28 ± 0.18 | 3.83 ± 2.57 | 6.63 ± 4.48 | 13.40 ± 1.22 | 26.9 ± 13.7 | 13.8 ± 12.6 | 20.2 ± 12.3 | 9.7 ± 7.3        | 294.0 ± 161.9    | 25.7 ± 5.5   |
| <i>Oleaceae</i>      | <i>Fraxinus pennsylvanica</i>     | 7.37        | 0.22        | 2.82        | 4.87        | 13.00        | 18.4        | 25.2        | 10.6        | 2.2              | 134.0            | 12.4         |
| <i>Oxalidaceae</i>   | <i>Oxalis fontana</i>             | 7.51        | 0.11        | 1.53        | 2.64        | 13.90        | 30.2        | 18.6        | 22.4        | 8.2              | 330.0            | 26.4         |
| <i>Poaceae</i>       | <i>Eragrostis albensis</i>        | 7.53 ± 0.34 | 0.19 ± 0.02 | 2.20 ± 0.08 | 3.79 ± 0.15 | 11.63 ± 1.50 | 17.1 ± 4.1  | 10.9 ± 3.2  | 9.3 ± 1.5   | 6.7 ± 1.5        | <b>3.4 ± 0.7</b> | 254.0 ± 45.0 |
| <i>Polygonaceae</i>  | <i>Reynoutria japonica</i>        | 6.51 ± 0.89 | 0.15 ± 0.09 | 1.87 ± 1.08 | 3.22 ± 1.86 | 12.96 ± 1.05 | 21.6 ± 11.1 | 14.2 ± 7.5  | 18.8 ± 14.2 | <b>2.1 ± 1.2</b> | 162.4 ± 87.7     | 3.9 ± 2.0    |
| <i>Rosaceae</i>      | <i>Padus serotina</i>             | 5.85 ± 0.83 | 0.40 ± 0.27 | 5.14 ± 2.96 | 8.87 ± 5.11 | 13.57 ± 1.55 | 6.2 ± 2.4   | 10.4 ± 4.8  | 3.7 ± 2.4   | 2.6 ± 1.4        | 54.7 ± 23.2      | 8.9 ± 9.6    |
|                      | <i>Spiraea ×pseudosalicifolia</i> | 6.60        | 0.28        | 4.60        | 7.93        | 16.50        | 19.0        | 6.0         | 14.0        | 4.0              | 134.0            | 13.0         |
| <i>Solanaceae</i>    | <i>Lycopersicon esculentum</i>    | 7.86        | 0.09        | 1.46        | 2.52        | 15.40        | 9.0         | 30.0        | 7.0         | 10.2             | 272.0            | 17.2         |
| <i>Typhaceae</i>     | <i>Typha laxmannii</i>            | 7.08        | 0.23        | 3.66        | 6.31        | 16.20        | 13.6        | 12.1        | 9.4         | 3.6              | 228.0            | 22.0         |
| <i>Vitaceae</i>      | <i>Parthenocissus inserta</i>     | 6.54        | 0.26        | 3.74        | 6.44        | 14.60        | 18.4        | 12.0        | 15.0        | 4.6              | 180.0            | 18.8         |

The results are presented as means ± SD in the case of soils collected from under 25 plant species. In the other 12 species, only single bulk samples were analyzed (see Materials and Methods). **Bold numbers** indicate significant effects ( $p < 0.05$ ; see Results section).
